# Supplementary material for: Modelling of high-temperature order–disorder phase transitions of non-stoichiometric Mo2C and Ti2C from first principles
Source: Royal Society of Chemistry journal article supplement (doi:10.1039/d1cp02935e), 2021-01-01
Supplement: d1cp02935e1.pdf [file d1cp02935e1.pdf]

Electronic supplementary information (ESI)

## Modelling of high-temperature order-disorder phase transitions of non-stoichiometric $\text{Mo}_2\text{C}$ and $\text{Ti}_2\text{C}$ from first principles

Ignacio Borge-Durán, Denial Aias and Ilya Grinberg

Department of Chemistry  
Bar-Ilan University, Ramat Gan, 5290002, Israel

MCSA for  $\text{Mo}_2\text{C}$  exploring only the angular component

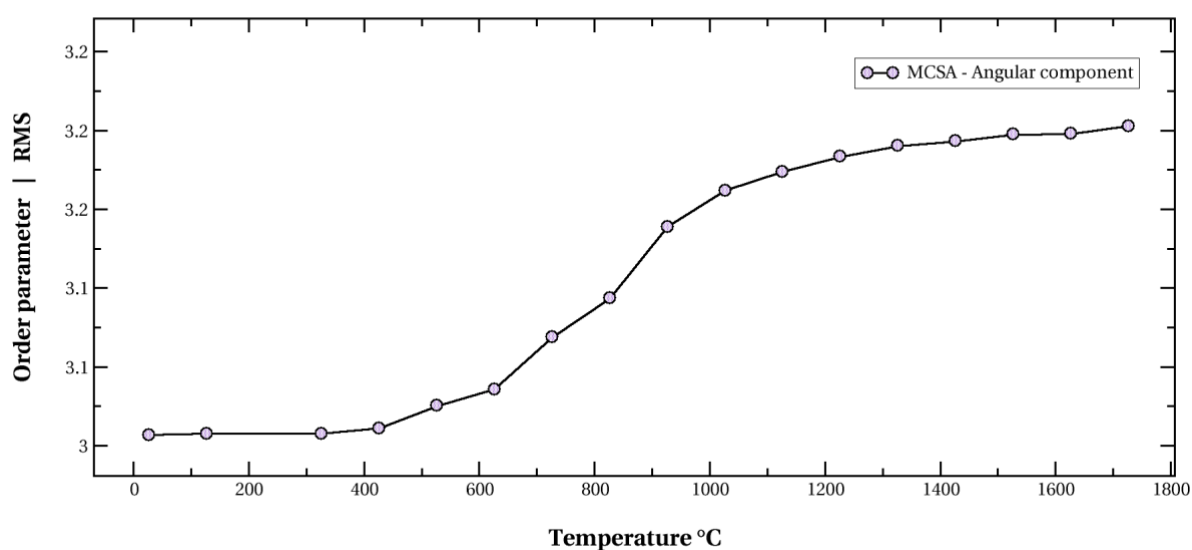

Figure S1. Monte Carlo simulated annealing (MCSA) using only the angular component contribution for  $\text{Mo}_2\text{C}$ .

MCSA for  $\text{Mo}_2\text{C}$  exploring only the bond valence component

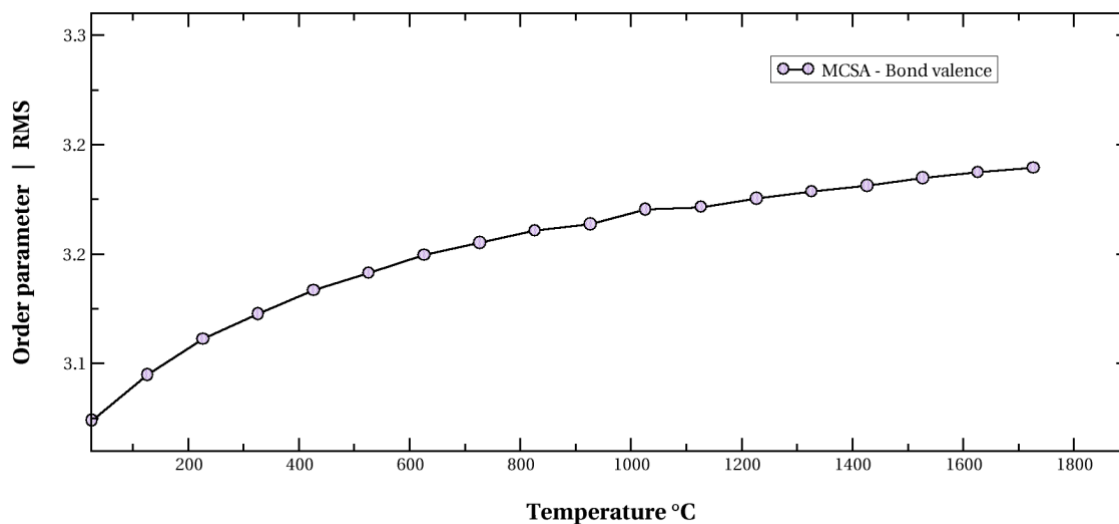

Figure S2. Monte Carlo simulated annealing (MCSA) using only the bond valence component contribution for  $\text{Mo}_2\text{C}$ .

MCSA for Mo<sub>2</sub>C exploring only the C<sup>2</sup> component

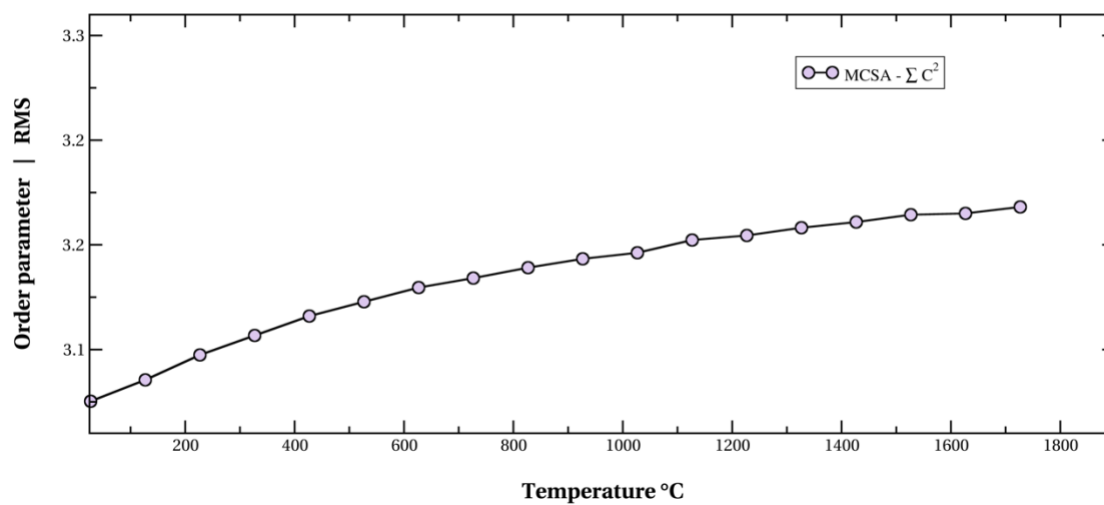

Figure S3. Monte Carlo simulated annealing (MCSA) using only the C<sup>2</sup> summation component contribution for Mo<sub>2</sub>C.
